# Supplementary material for: Measurement report: Impact of cloud processes on secondary organic aerosols at a forested mountain site in southeastern China
Source: Copernicus journal article supplement (doi:10.5194/acp-24-8473-2024), 2024-07-29
Supplement: Supplementary file 1 [file acp-24-8473-2024-supplement.pdf]

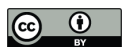

*Supplement of*

**Measurement report: Impact of cloud processes on secondary organic aerosols at a forested mountain site in southeastern China**

**Zijun Zhang et al.**

*Correspondence to:* Weiqi Xu ([xuweiqi@mail.iap.ac.cn](mailto:xuweiqi@mail.iap.ac.cn)) and Yele Sun ([sunyele@mail.iap.ac.cn](mailto:sunyele@mail.iap.ac.cn))

The copyright of individual parts of the supplement might differ from the article licence.

## S1. PMF diagnosis

In this study, organic mass spectra together with several selected inorganic ions ( $\text{SO}^+$ ,  $\text{SO}_2^+$ ,  $\text{SO}_3^+$ ,  $\text{HSO}_3^+$ ,  $\text{H}_2\text{SO}_4^+$ ,  $\text{NO}^+$ ,  $\text{NO}_2^+$ ,  $\text{NH}^+$ ,  $\text{NH}_2^+$ ,  $\text{NH}_3^+$ ,  $\text{Cl}^+$ , and  $\text{HCl}^+$ ) were analyzed by the PMF. The number of factors from 1 to 5 with  $f_{\text{Peak}}$  varying from -1 to 1 were evaluated, and the diagnostic plots are shown in Figure S2. In the PMF analysis, the  $Q/Q_{\text{exp}}$  values represent the ratios between the actual sum of the squares of the scaled residuals (quality-of-fit parameter,  $Q$ ) obtained from the PMF least square fit and the ideal  $Q$  ( $Q_{\text{exp}}$ ) obtained if the fit residuals at each point were equal to the noise specified for each data point. Typically, a strong change in  $Q/Q_{\text{exp}}$  value with the addition of a factor indicates that more of the variability of the data is explained (Patero and Tapper, 1993; Ulbrich et al., 2009). As shown in Figure S4a, The  $Q/Q_{\text{exp}}$  value started to greatly decrease from one- (1.52) to three-factor solution (1.05). However, the three-factor solution (including one organic associated with sulfate ions factor ( $\text{SO}_4\text{-OA}$ ), one inorganic nitrate factor (NIA), and one oxygenated OA (OOA)) cannot further differentiate OOA with different oxidation degrees. The four-factor solution, with a  $Q/Q_{\text{exp}}$  value of 1.0065, can separate two OOA factors with different elemental ratios and temporal variations. Continuing to increase the factor number cannot significantly decrease the  $Q/Q_{\text{exp}}$ . Furthermore, with 4 factors, the reconstructed mass tracked well with the variations of measured mass, and the scaled residuals of all ion fragments were distributed between -4–4 (Figs. S2c and d), suggesting that they were well reproduced by the PMF model. Therefore, we considered the four-factor solution with  $f_{\text{Peak}} = 0$  to be the optimum solution for PMF analysis in this study.

**Table S1.** Summary of the detailed descriptions for the instruments used during the sampling period, including the measured parameters, model, temporal resolution, and sampling time.

| Instrument           | Species                                                                             | Model/Company                                 | Time resolution | Sampling time         |
|----------------------|-------------------------------------------------------------------------------------|-----------------------------------------------|-----------------|-----------------------|
| Q-ACSM               | NR-PM <sub>1</sub> (Org, SO <sub>4</sub> , NO <sub>3</sub> , NH <sub>4</sub> , Chl) | Aerodyne Research Inc.                        | 20 min          | 11.1–30               |
| HR-ToF-AMS           | NR-PM <sub>1</sub> (Org, SO <sub>4</sub> , NO <sub>3</sub> , NH <sub>4</sub> , Chl) | Aerodyne Research Inc.                        | 1 min           | 11.15–20;<br>11.24–28 |
| AE33                 | BC                                                                                  | Magee Scientific Corp.                        | 1 min           | 11.1–30               |
| CO analyzer          | CO                                                                                  | Picarro G2401                                 | 1 min           | 11.1–30               |
| Gas analyzers        | O <sub>3</sub> , NO <sub>x</sub>                                                    | Thermo Scientific                             | 1 min           | 11.1–30               |
| PM analyzer          | PM <sub>2.5</sub> , PM <sub>10</sub>                                                | Thermo Scientific                             | 1 min           | 11.1–30               |
| Data logger          | RH, T, WS, WD, P                                                                    | CR1000, Campbell Scientific Inc.              | 1 min           | 11.1–30               |
| Four-cup anemometers | WS, WD                                                                              | Model O1OC and O2OC, Met One Instruments Inc. | 1 min           | 11.1–30               |
| P Sensor             | P                                                                                   | CS106, Vaisala Ltd.                           | 1 min           | 11.1–30               |
| T/RH probe           | T, RH                                                                               | HC2S3, Campbell Scientific Inc.               | 1 min           | 11.1–30               |
| Particle lidar       | Depolarization ratio                                                                | Science of Light Technologies Co., Ltd        | 5 min           | 11.19–20;<br>11.25–27 |

**Table S2.** The detection limits (in  $\text{ng m}^{-3}$ ) of ACSM (20 min average time) and AMS (1 min average time) for different NR-PM<sub>1</sub> chemical species that are determined as 3 times the standard deviation of mass concentrations during a period (16–20 November) with low particle concentration.

| Species         | ACSM | AMS |
|-----------------|------|-----|
| Org             | 1500 | 97  |
| SO <sub>4</sub> | 497  | 18  |
| NO <sub>3</sub> | 166  | 28  |
| NH <sub>4</sub> | 201  | 37  |
| Chl             | 130  | 7.6 |

**Table S3.** Summary of mean mass concentrations (in  $\mu\text{g m}^{-3}$ ) and chemical composition of submicron aerosols measured at selected mountain sites in China.

| Location           |       | Mt. Wuzhi          | Mt. Tai              |        |        |        | Mt. Yulong           | Mt. Daban         | Mt. Waliguan         |
|--------------------|-------|--------------------|----------------------|--------|--------|--------|----------------------|-------------------|----------------------|
| Time               |       | 3/19/2015          | 2011                 |        |        |        | 3/22/2015            | 9/5/2013          | 7/1/2017             |
|                    |       | 4/15/2015          | Spr                  | Sum    | Aut    | Win    | 4/14/2015            | 10/15/2013        | 7/31/2017            |
| Org                | Mass  | 4.8                | 8.6                  | 16.4   | 5.7    | 11.6   | 3.9                  | 4.9               | 3.5                  |
|                    | Frac. | 43.8 %             | 28.4 %               | 29.4 % | 31.5 % | 31.6 % | 68 %                 | 43.2 %            | 38.1 %               |
| SO <sub>4</sub>    | Mass  | 3.4                | 7.3                  | 20.1   | 5.7    | 8.7    | 0.8                  | 3.2               | 3.1                  |
|                    | Frac. | 30.9 %             | 24.1 %               | 36.0 % | 31.5 % | 23.7 % | 14 %                 | 28.2 %            | 34.5 %               |
| NO <sub>3</sub>    | Mass  | 0.5                | 8.8                  | 8.3    | 3.8    | 9.6    | 0.2                  | 1.2               | 0.7                  |
|                    | Frac. | 4.7 %              | 20.9 %               | 14.9 % | 21.0 % | 26.2 % | 4 %                  | 10.6 %            | 8.1 %                |
| NH <sub>4</sub>    | Mass  | 1.5                | 5.6                  | 11.0   | 2.9    | 6.8    | 0.3                  | 1.4               | 1.4                  |
|                    | Frac. | 13.7 %             | 18.5 %               | 19.7 % | 16.0 % | 18.5 % | 5 %                  | 12.3 %            | 15.2 %               |
| Chl                | Mass  | 0.03               |                      |        |        |        |                      | 0.14              | 0.1                  |
|                    | Frac. | 0.3 %              |                      |        |        |        |                      | 1.2 %             | 1.1 %                |
| BC                 | Mass  | 0.7                |                      |        |        | 0.5    | 0.51                 | 0.3               |                      |
|                    | Frac. | 6.6 %              |                      |        |        | 9 %    | 4.5 %                | 3.0 %             |                      |
| NR-PM <sub>1</sub> |       | 10.2               | 30.3                 | 55.8   | 18.1   | 36.7   | 5.2                  | 10.9              | 8.8                  |
| PM <sub>1</sub>    |       | 10.9               |                      |        |        |        | 5.7                  | 11.4              | 9.1                  |
| References         |       | (Zhu et al., 2016) | (Zhang et al., 2014) |        |        |        | (Zheng et al., 2017) | (Du et al., 2015) | (Zhang et al., 2019) |

**Table S4.** Summary of main PM<sub>1</sub> chemical components, air pollutants, and meteorological parameters (average  $\pm$  standard deviation) during different periods.

| Species                                                   |                                            | Entire study      | C1                | EP5               |
|-----------------------------------------------------------|--------------------------------------------|-------------------|-------------------|-------------------|
| <i>PM<sub>1</sub> species</i><br>( $\mu\text{g m}^{-3}$ ) | PM <sub>1</sub>                            | 4.29 $\pm$ 4.82   | 1.34 $\pm$ 0.83   | 9.39 $\pm$ 5.57   |
|                                                           | Org                                        | 1.84 $\pm$ 1.63   | 0.74 $\pm$ 0.48   | 4.22 $\pm$ 2.54   |
|                                                           | NO <sub>3</sub>                            | 0.63 $\pm$ 1.48   | 0.13 $\pm$ 0.20   | 1.74 $\pm$ 1.51   |
|                                                           | SO <sub>4</sub>                            | 0.72 $\pm$ 0.55   | 0.09 $\pm$ 0.10   | 1.54 $\pm$ 0.93   |
|                                                           | NH <sub>4</sub>                            | 0.64 $\pm$ 0.78   | 0.12 $\pm$ 0.10   | 1.01 $\pm$ 0.66   |
|                                                           | Chl                                        | 0.02 $\pm$ 0.02   | 0.01 $\pm$ 0.02   | 0.06 $\pm$ 0.05   |
|                                                           | BC                                         | 0.44 $\pm$ 0.36   | 0.25 $\pm$ 0.14   | 0.82 $\pm$ 0.47   |
| <i>Air pollutants</i><br>(ppbv)                           | O <sub>3</sub>                             | 13.70 $\pm$ 12.42 | 4.80 $\pm$ 4.73   | 15.0 $\pm$ 7.15   |
|                                                           | NO                                         | 0.55 $\pm$ 0.95   | 0.78 $\pm$ 1.62   | 0.32 $\pm$ 0.09   |
|                                                           | NO <sub>2</sub>                            | 3.45 $\pm$ 3.33   | 5.00 $\pm$ 4.88   | 2.20 $\pm$ 1.03   |
|                                                           | CO (ppmv)                                  | 0.26 $\pm$ 0.12   | 0.36 $\pm$ 0.09   | 0.26 $\pm$ 0.07   |
|                                                           | PM <sub>2.5</sub> ( $\mu\text{g m}^{-3}$ ) | 6.74 $\pm$ 7.11   | 2.08 $\pm$ 1.67   | 15.27 $\pm$ 9.03  |
|                                                           | PM <sub>10</sub> ( $\mu\text{g m}^{-3}$ )  | 15.78 $\pm$ 13.23 | NA                | 21.19 $\pm$ 12.83 |
| <i>Meteorological parameters</i>                          | <i>T</i> ( $^{\circ}\text{C}$ )            | 13.03 $\pm$ 6.13  | 11.58 $\pm$ 1.92  | 11.93 $\pm$ 1.64  |
|                                                           | RH (%)                                     | 86.98 $\pm$ 16.60 | 100 $\pm$ 0       | 93.90 $\pm$ 8.11  |
|                                                           | WS ( $\text{m s}^{-1}$ )                   | 2.42 $\pm$ 1.24   | 2.17 $\pm$ 1.51   | 3.24 $\pm$ 1.83   |
|                                                           | <i>P</i> (hPa)                             | 894.28 $\pm$ 3.21 | 894.43 $\pm$ 1.20 | 893.29 $\pm$ 1.07 |

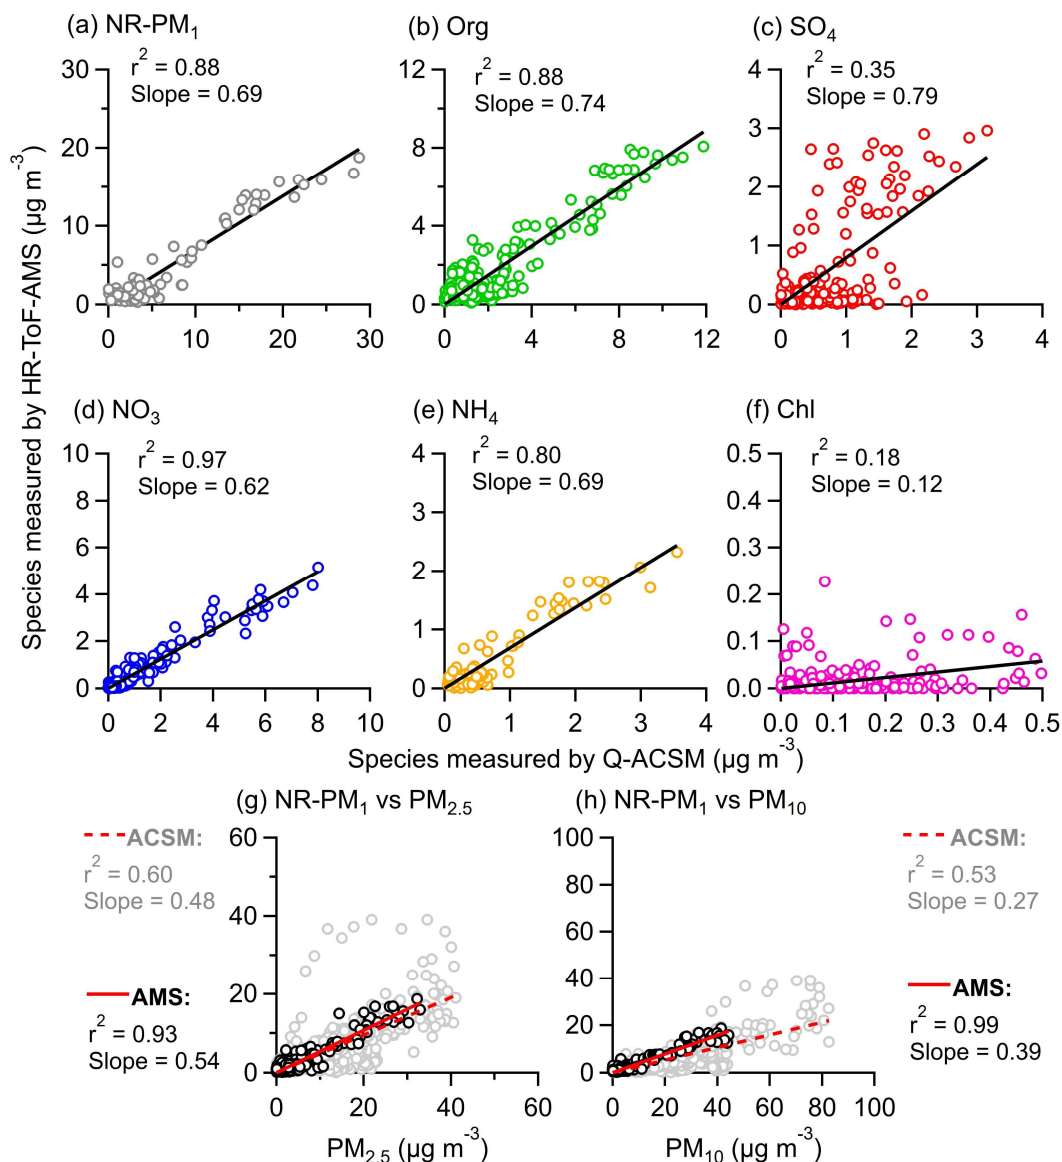

**Figure S1.** (a-f) Comparison of different NR-PM<sub>1</sub> species measured by ACSM and AMS during the AMS sampling period (15–20, 24–28 Nov); (g-h) Scatter plots of mass concentrations of NR-PM<sub>1</sub> measured by ACSM (grey) and AMS (black) vs. PM<sub>2.5</sub> and PM<sub>10</sub> measured by particulate monitor. The black and red lines are linear-fit lines.

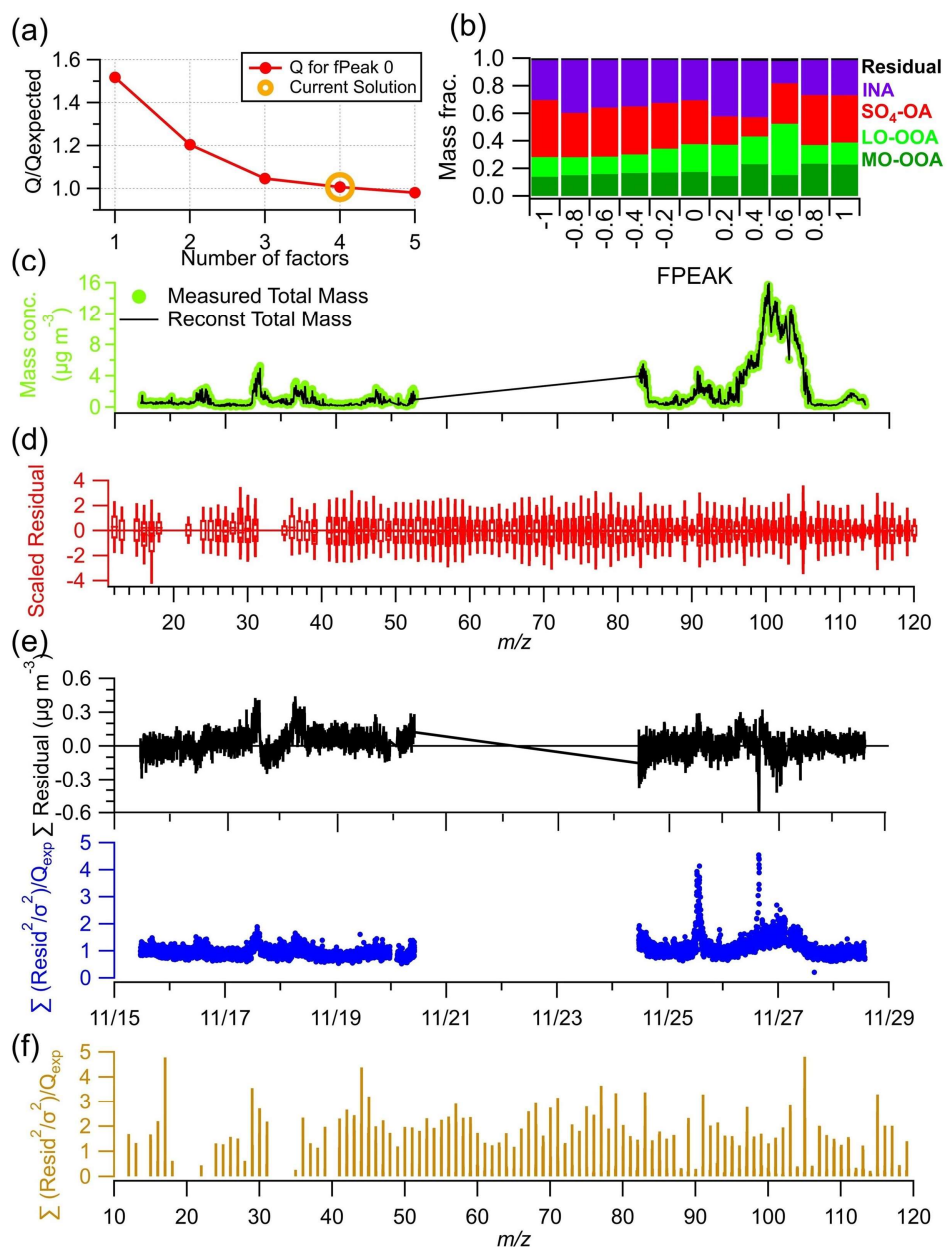

**Figure S2.** PMF key diagnostic plots: (a)  $Q/Q_{\text{expected}}$  vs. PMF factors at fPeak = 0; (b) mass fraction of PMF factors vs. fPeak; (c) time series of the reconstructed and measured total organic mass; (d) scaled residual for each mass; (e) time series of the residual of PMF solutions and  $Q/Q_{\text{expected}}$ ; (f) the  $Q/Q_{\text{expected}}$  for each mass.

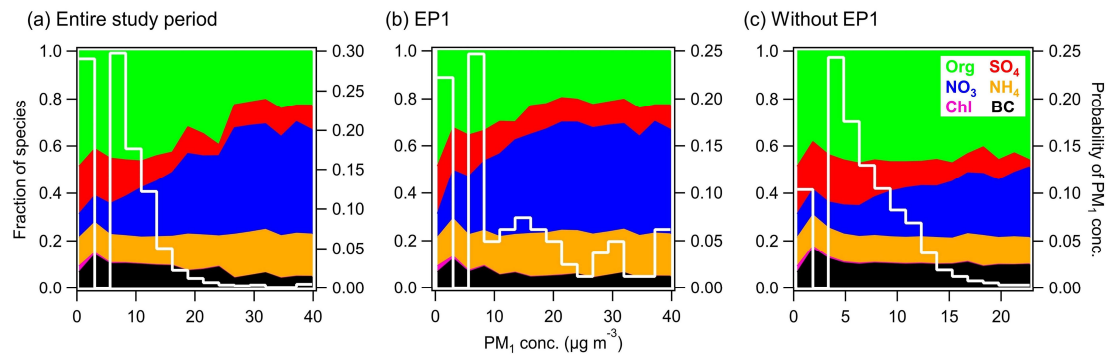

**Figure S3.** Variations of aerosol composition as a function of PM<sub>1</sub> mass concentration and the probability density of PM<sub>1</sub> during (a) the entire campaign, (b) EP1, and (c) the campaign without EP1.

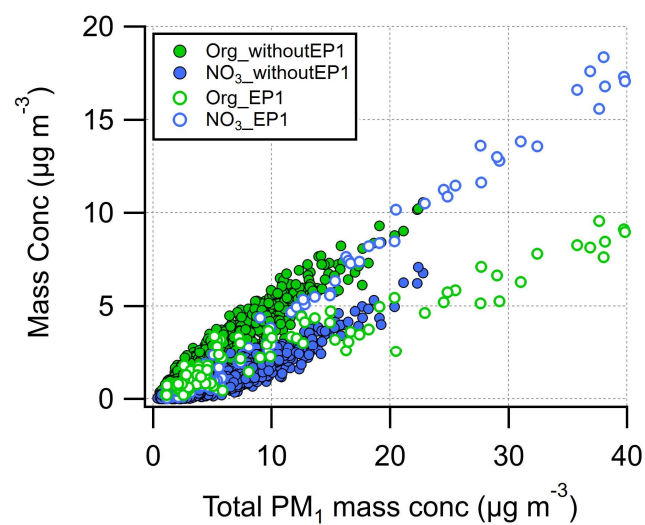

**Figure S4.** Mass concentrations of organic and nitrate as a function of total PM<sub>1</sub> mass concentration. White circles represent data during the nitrate episode (EP1).

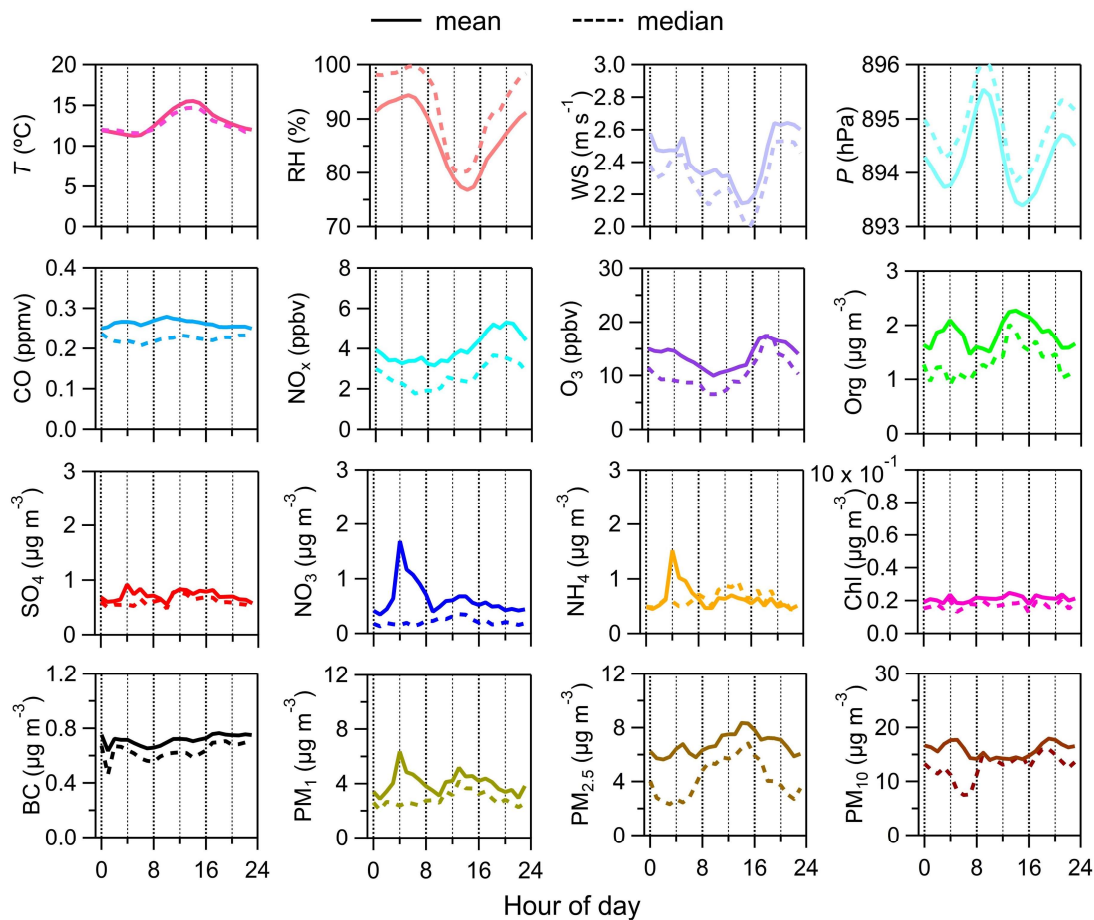

**Figure S5.** Diurnal variations of PM<sub>1</sub> species (BC + NR-PM<sub>1</sub> measured by ACSM), air pollutants, and meteorological parameters during the entire campaign (1–30 November).

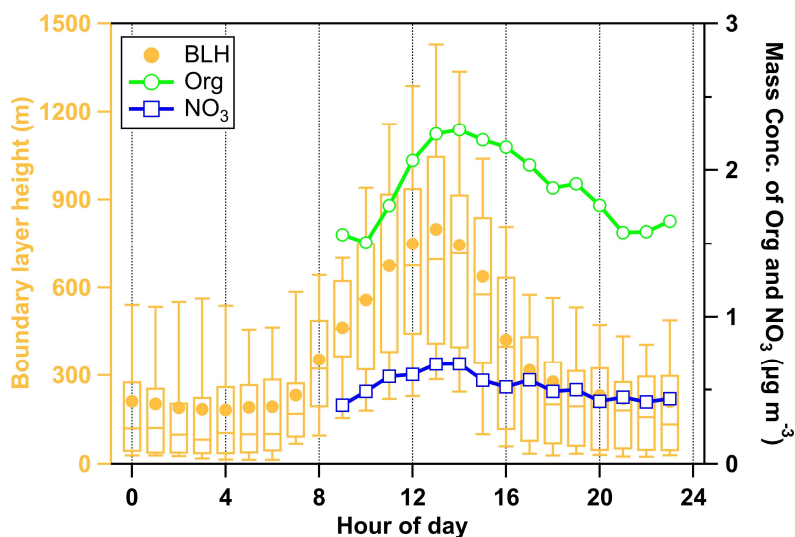

**Figure S6.** Diurnal variations of boundary layer height along with mass concentrations of organics and nitrate. Data of organics and nitrate before 9:00 was omitted for ease of comparison.

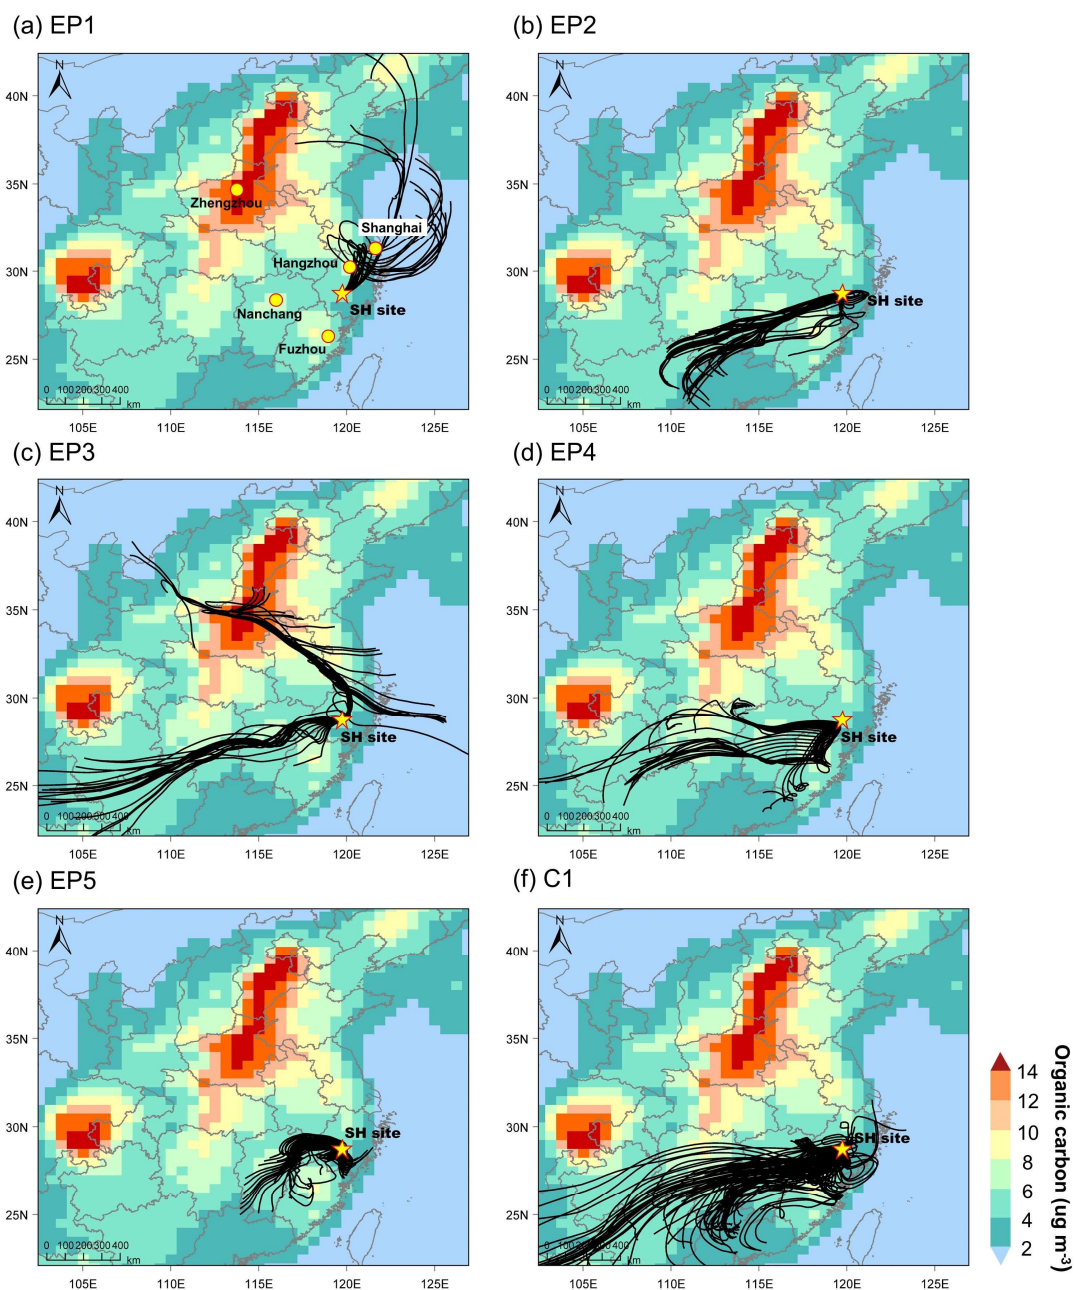

**Figure S7.** 72 h air mass back trajectories calculated at 1 h intervals at the SH site during six selected periods.

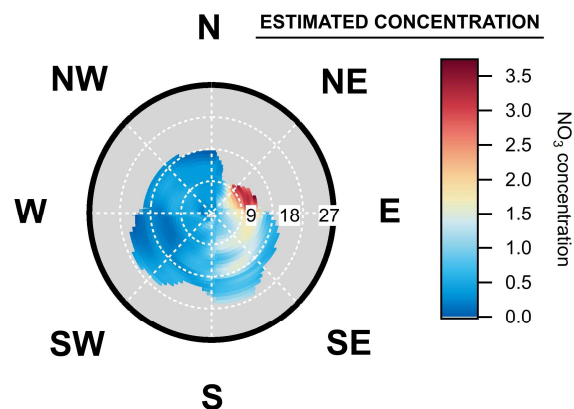

**Figure S8.** Non-Parametric Wind (NWR) regression polar plot for nitrate calculated for EP1 at the SH site. Analysis was performed using the ZeFir toolbox (Petit et al., 2017) developed within the Igor Pro software.

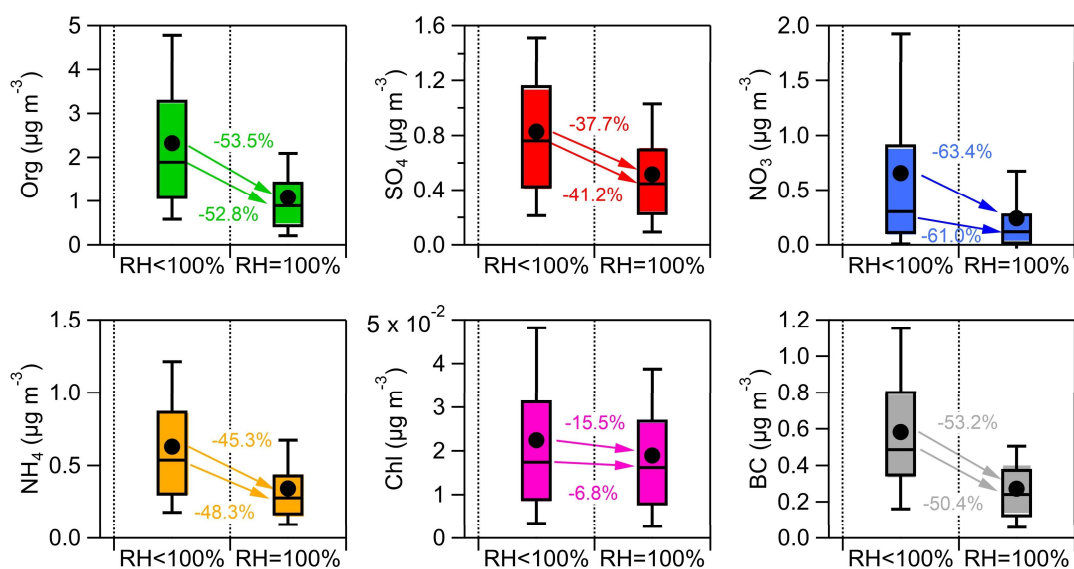

**Figure S9.** Comparison of mean and median mass concentrations of PM<sub>1</sub> species under conditions of RH below and at 100 % over the campaign without EP1 and EP3.

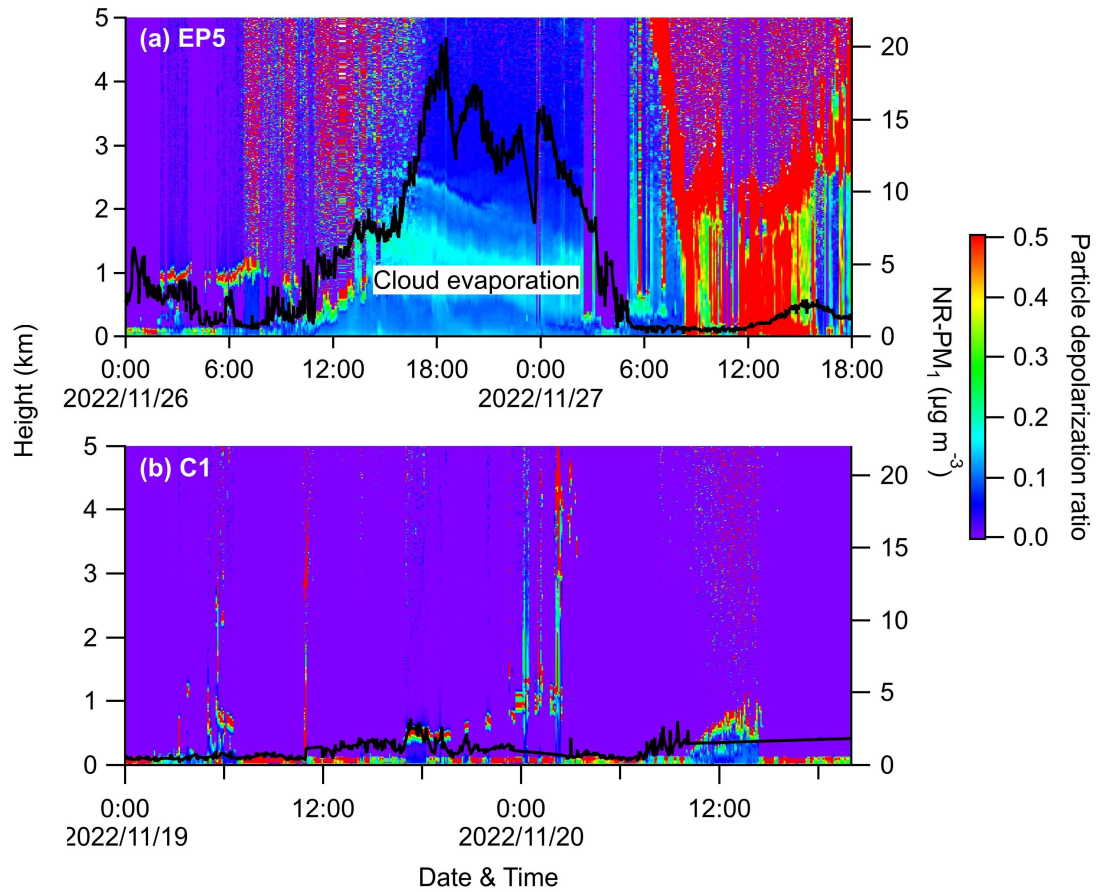

**Figure S10.** Vertical distribution of particle depolarization ratios in (a) EP5 and (b) C1.

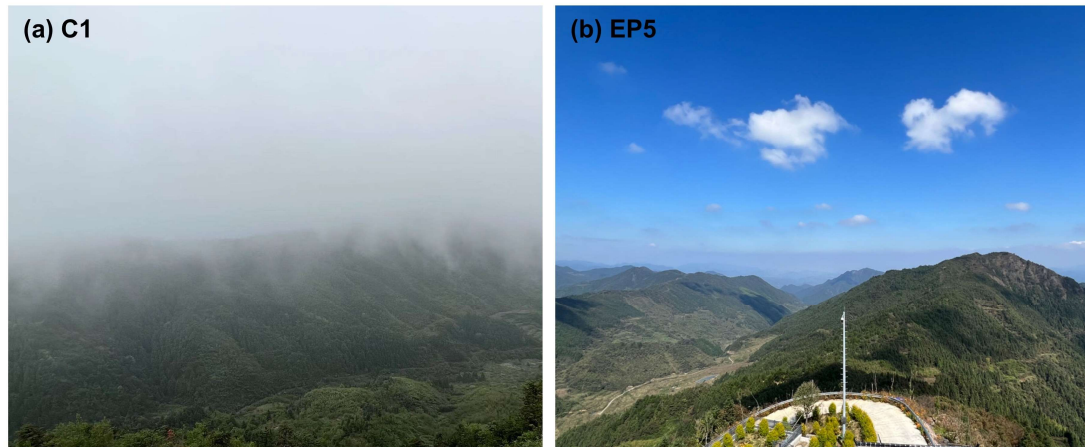

**Figure S11.** The weather condition in (a) C1 and (b) EP5 (photos were taken on the roof of the sampling site at local time ~15:00 on 19 Nov and 26 Nov).

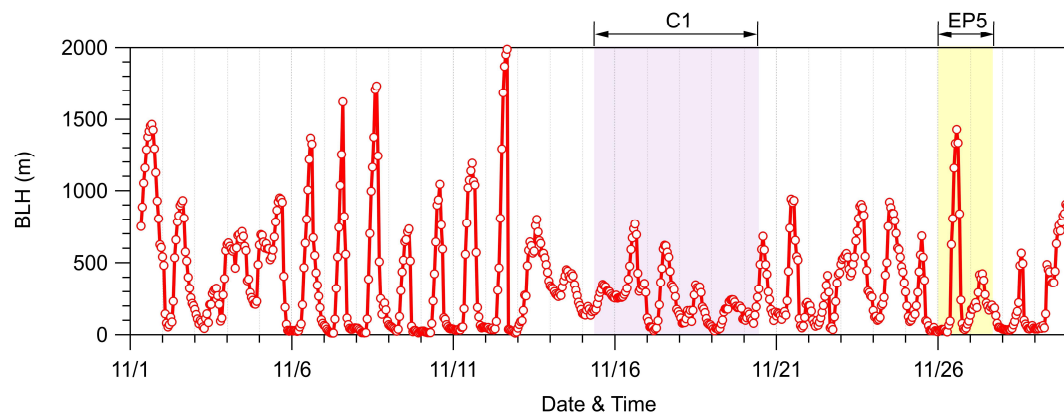

**Figure S12.** Time series of boundary layer height during the sampling period.

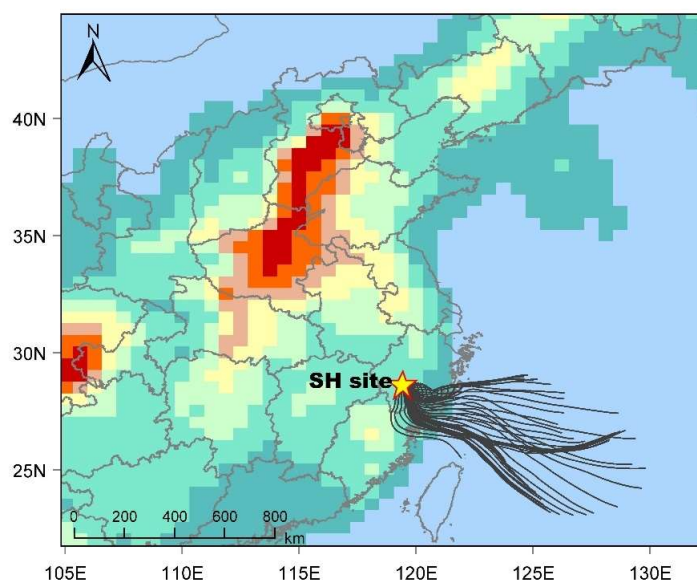

**Figure S13.** 72 h air mass back trajectories calculated at 1 h intervals at the SH site during 10–12 November.

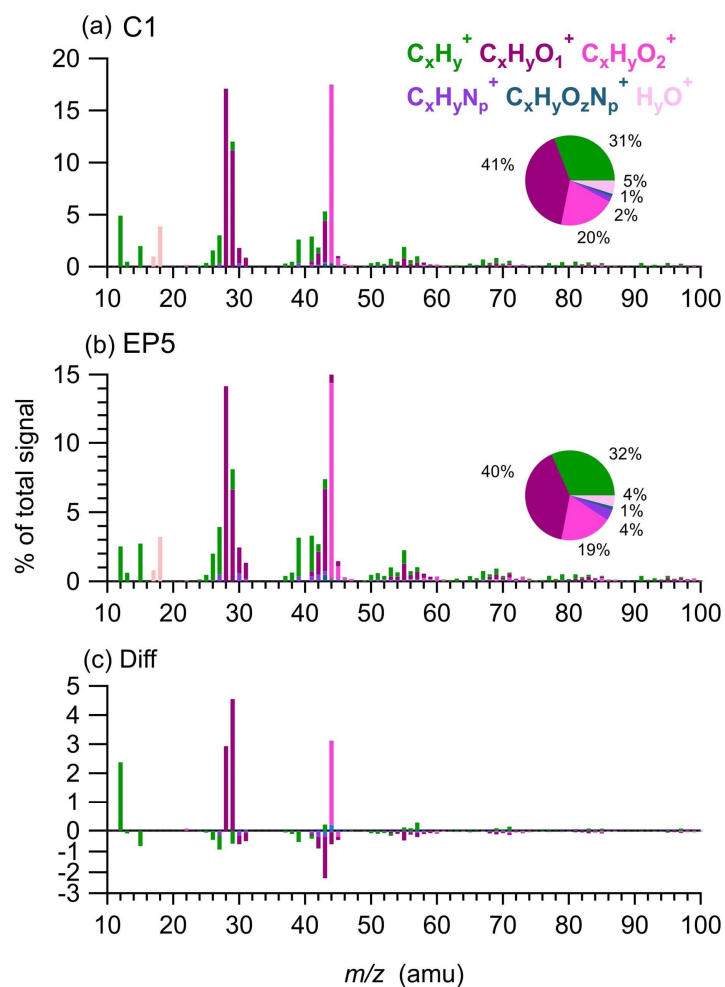

**Figure S14.** The average high-resolution mass spectra of OA sampled at SH site colored by six ion categories during (a) C1 and (b) EP5, as well as (c) the difference in these two mass spectra.

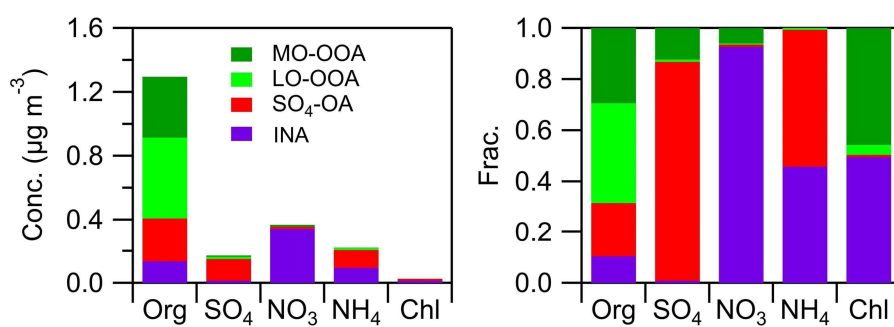

**Figure S15.** Mass concentrations and mass fractions of NR- $PM_1$  species in four PMF factors.

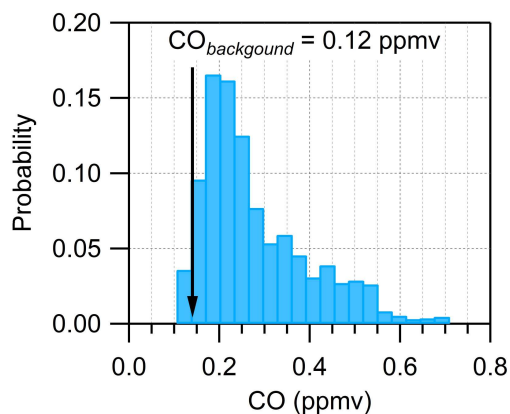

**Figure S16.** Probability distribution of the mixing ratio of CO during the entire campaign.

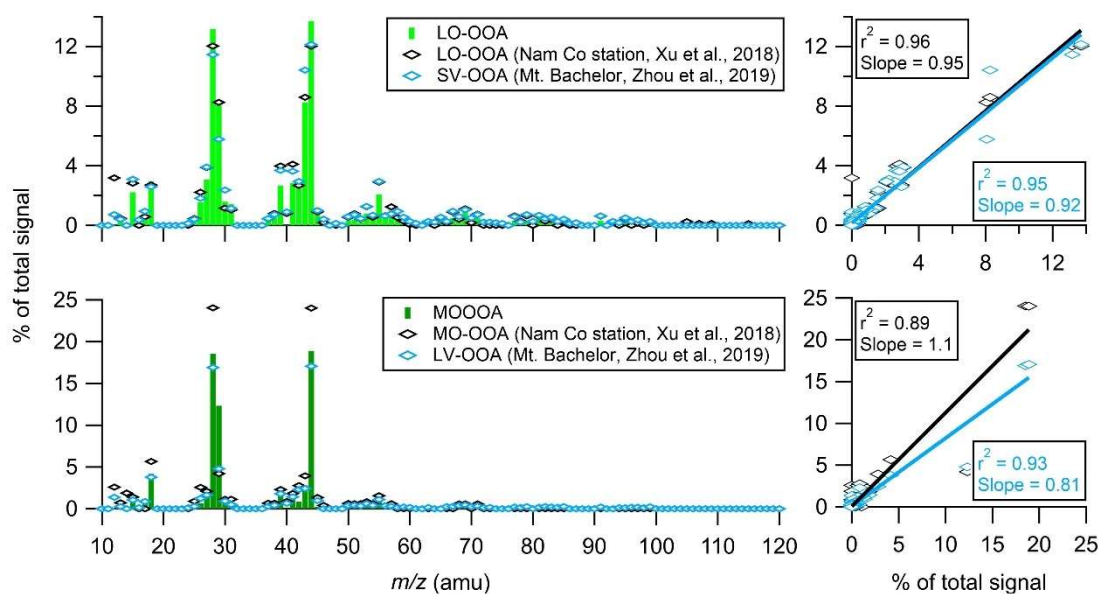

**Figure S17.** Comparison of the mass spectra of OA in this study with other two mountain stations. The correlation of the mass spectra of these OA factors are also shown.

## References

- Du, W., Sun, Y. L., Xu, Y. S., Jiang, Q., Wang, Q. Q., Yang, W., Wang, F., Bai, Z. P., Zhao, X. D., and Yang, Y. C.: Chemical characterization of submicron aerosol and particle growth events at a national background site (3295 m a.s.l.) on the Tibetan Plateau. *Atmos. Chem. Phys.*, 15, 10811–10824, <https://doi.org/10.5194/acp-15-10811-2015>, 2015.
- Petit, J. E., Favez, O., Albinet, A., and Canonaco, F.: A user-friendly tool for comprehensive evaluation of the geographical origins of atmospheric pollution: Wind and trajectory analyses, *Environ. Modell. Softw.*, 88, 183–187, <https://doi.org/10.1016/j.envsoft.2016.11.022>, 2017.
- Paatero, P. and Tapper, U.: Analysis of different modes of factor analysis as least squares fit problems, *Chemometr. Intell. Lab.*, 18, 183–194, 1993.
- Xu, J., Zhang, Q., Shi, J., Ge, X., Xie, C., Wang, J., Kang, S., Zhang, R., and Wang, Y.: Chemical characteristics of submicron particles at the central Tibetan Plateau: insights from aerosol mass spectrometry, *Atmos. Chem. Phys.*, 18, <https://doi.org/10.5194/acp-18-427-2018>, 2018.
- Ulbrich, I. M., Canagaratna, M. R., Zhang, Q., Worsnop, D. R., and Jimenez, J. L.: Interpretation of organic components from Positive Matrix Factorization of aerosol mass spectrometric data, *Atmos. Chem. Phys.*, 9, 2891–2918, <https://doi.org/10.5194/acp-9-2891-2009>, 2009.
- Zhang, Y. M., Zhang, X. Y., Sun, J. Y., Hu, G. Y., Shen, X. J., Wang, Y. Q., Wang, T. T., Wang, D. Z., and Zhao, Y.: Chemical composition and mass size distribution of PM<sub>1</sub> at an elevated site in central east China. *Atmos. Chem. Phys.*, 14, 12237–12249, <https://doi.org/10.5194/acp-14-12237-2014>, 2014.
- Zhu, Q., He, L. Y., Huang, X. F., Cao, L. M., Gong, Z. H., Wang, C., Zhuang, X., and Hu, M.: Atmospheric aerosol compositions and sources at two national background sites in northern and southern China. *Atmos. Chem. Phys.*, 16, 10283–10297, <https://doi.org/10.5194/acp-16-10283-2016>, 2016.
- Zhang, X., Xu, J., Kang, S., Zhang, Q., and Sun, J.: Chemical characterization and sources of submicron aerosols in the northeastern Qinghai–Tibet Plateau: insights from high-resolution mass spectrometry. *Atmos. Chem. Phys.* 19, 7897–7911, <https://doi.org/10.5194/acp-19-7897-2019>, 2019.
- Zheng, J., Hu, M., Du, Z., Shang, D., Gong, Z., Qin, Y., Fang, J., Gu, F., Li, M., Peng, J., Li, J., Zhang, Y., Huang, X., He, L., Wu, Y., and Guo, S.: Influence of biomass burning from South Asia at a high-altitude mountain receptor site in China. *Atmos. Chem. Phys.*, 17, 6853–6864, <https://doi.org/10.5194/acp-17-6853-2017>, 2017.
- Zhou, S., Collier, S., Jaffe, D. A., and Zhang, Q.: Free tropospheric aerosols at the Mt. Bachelor Observatory: more oxidized and higher sulfate content compared to boundary layer aerosols, *Atmos. Chem. Phys.*, 19, 1571–1585, <https://doi.org/10.5194/acp-19-1571-2019>, 2019.
